# Supplementary material
Source: PubMed Central journal article supplement (PMC6904538)
Supplement: NIHMS1061045-supplement-Supplemental_Appendix.pdf [file NIHMS1061045-supplement-Supplemental_Appendix.pdf]

## SUPPLEMENTAL APPENDIX

### Chemoprophylaxis Exceptions

| Exception (with grace period, if applicable; otherwise exception applies to entire hospital stay)    | Exception Definitions                                                                                                                                                                                                                                                                                                                                                                                                                        |
|------------------------------------------------------------------------------------------------------|----------------------------------------------------------------------------------------------------------------------------------------------------------------------------------------------------------------------------------------------------------------------------------------------------------------------------------------------------------------------------------------------------------------------------------------------|
| Pregnant                                                                                             | Preoperative (within 30 days prior to the principal operative procedure) or postoperative documentation of pregnancy. (e.g. chart documentation, +uPT, elevated serum HCG > 25 mIU/mL)                                                                                                                                                                                                                                                       |
| Bleeding Disorder/Anticoagulation                                                                    | Documented diagnosis in the medical record preoperatively or postoperative of an active hematologic disorder (e.g. vitamin K deficiency, hemophilia, thrombocytopenia) or the administration of medication that interferes with blood clotting thereby predisposing the patient to excessive bleeding (e.g. heparin, Argatroban, warfarin or other medication intended to be administered at therapeutic anticoagulation dosing levels).     |
| Transfusion (transfusion days +1 day)*                                                               | Intraoperative or postoperative transfusion of red blood cells, whole blood, autologous blood, or cell-saver products.                                                                                                                                                                                                                                                                                                                       |
| Low Risk Surgery+                                                                                    | +Refer to CPT code list to determine procedures which meet this exception                                                                                                                                                                                                                                                                                                                                                                    |
| Intracranial or Epidural Surgery or Hemorrhage<br>(Bleeding days/Day of procedure [POD 0] + 7 days)* | Preoperative (within 7 days prior to the principal operative procedure), intraoperative, or postoperative documentation of intracranial or intraspinal surgery or intracranial or intraspinal bleeding. (e.g. uncomplicated craniotomy for cancer, traumatic injury that causes a spinal epidural hematoma, craniotomy complicated by bleeding, hemorrhagic stroke)<br>* Grace Period=Bleeding days/Day of procedure (POD 0) + 7 days        |
| Epidural or Spinal Anesthesia<br>(1 day before epidural placed to 1 day after removal)*              | Documentation of preoperative (epidural must be in place at the time the patient enters the OR for the principal operative procedure), intraoperative, or postoperative epidural or spinal anesthesia.<br>*Grace Period=1 day before epidural placed to 1 day after removal                                                                                                                                                                  |
| Hypothermia (hypothermia days + 1 day)*                                                              | Either (1) therapeutic hypothermia or (2) two consecutive temperature measurements equal to or less than 35.5 °C.<br>*Grace Period=days patient is hypothermic + 1 day                                                                                                                                                                                                                                                                       |
| Hypertension (hypertension days + 1 day)*                                                            | Two consecutive systolic blood pressure measurements within 24 hours, equal to or greater than 200.<br>*Grace Period=days patient is hypertensive + 1 day                                                                                                                                                                                                                                                                                    |
| Active Bleeding (bleeding days + 1 day)*                                                             | Preoperative (within 24 hours prior to the principal operative procedure), intraoperative, or postoperative evidence of bleeding requiring vital sign or hemoglobin monitoring by clinical care team. (e.g. tachycardia and hypotension with decreasing hemoglobin and/or transfusion)<br>*Grace Period=days patient is actively bleeding + 1 day                                                                                            |
| High Risk for Bleeding (high risk days + 1 day)*                                                     | Preoperative (within 24 hours prior to the principal operative procedure), intraoperative, or postoperative evidence of concern for bleeding requiring vital sign or hemoglobin monitoring by clinical care team. (e.g. s/p major operation with ICU admission and/or serial hemoglobins, documentation in operative dictation of difficult operation/dissection)<br>*Grace Period=days patient is considered high risk for bleeding + 1 day |
| Palliative Care or Clinical Study                                                                    | Preoperative (within 30 days prior to the principal operative procedure), intraoperative, or postoperative documentation of palliative care status (as defined by the hospital; not necessarily equivalent with DNR/DNI) or enrollment in a clinical study/protocol.                                                                                                                                                                         |
| Held for Procedure                                                                                   | Chemoprophylaxis held for up to 12 hours prior to the start of procedure or patient in procedure at the time when chemoprophylaxis is due. Examples of where a procedure may take place to meet the exclusion include: IR, OR, bedside, cath lab.                                                                                                                                                                                            |
| Day of Discharge                                                                                     | Date the patient is discharged from the hospital where the principal operative procedure was performed.                                                                                                                                                                                                                                                                                                                                      |

\*Grace Period Example-POD 2 and epidural is placed for postoperative pain control. The epidural is then removed on POD 5. The patient meets the exception of epidural anesthesia with the grace period for POD 1, POD 2, POD 3, POD 4, POD 5, and POD 6. POD 1 being the day before the epidural is placed and POD 6 being 1 day after the epidural was removed.
